# Supplementary material
Source: publisher figshare collection journal article supplement (https://tandf.figshare.com/ndownloader/files/17786204)

**Supplemental Figure 1**


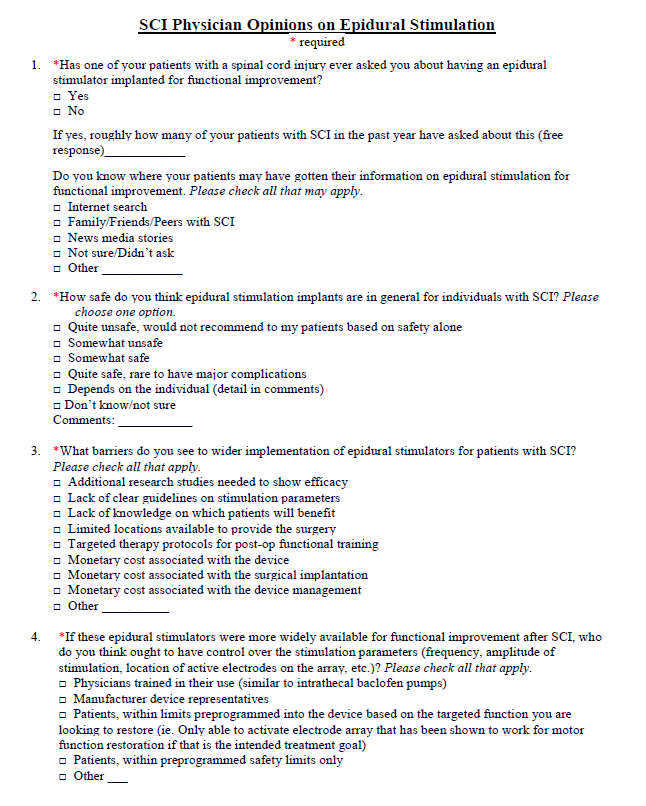

Supplement: Supplementary file 1 [file 17786204]
